# Supplementary material
Source: Research Square preprint supplement (doi:10.21203/rs.3.rs-9918199/v1)
Supplement: Supplementary file 1 [file a88375f3fadb24b36b5b60b2.docx]

**Appendix A1:** Measurement items

| **Constructs** | **Measurement Items** |
| --- | --- |
|  |
| Recognition Courage | RC01. My supervisor acknowledges personal mistakes when they occur.  RC02. My supervisor admits mistakes promptly.  RC03. My supervisor openly acknowledges mistakes, even when doing so may reflect negatively on them.  RC04. My supervisor clearly communicates personal errors to others.  RC05. My supervisor is honest with team members about mistakes they have made, even at the risk of appearing incompetent.  RC06. My supervisor voluntarily discloses personal mistakes. |  |
| Procedural Justice | PF01. My supervisor willingly accepts responsibility for their own mistakes within the organization.  PF05. My supervisor takes responsibility for the outcomes of their decisions and actions.  PF06. When organizational outcomes are disappointing, my supervisor first reflects on their own role. |  |
| Authenticity | AUT01. I am able to express my views and feelings when addressing problems caused by my supervisor’s mistakes.  AUT02. My supervisor was willing to adjust the problem-solving process to accommodate my requests when addressing issues resulting from their mistakes.  AUT03. Problems resulting from my supervisor’s mistakes are resolved through fair procedures.  AUT04. Overall, the way my supervisor handles their own mistakes is fair.  AUT06. I am able to influence decisions related to resolving problems caused by my supervisor’s mistakes. |  |
| Responsibility | TB01. I have strong confidence in my supervisor’s honesty.  TB02. I am confident that my supervisor intends to treat me fairly.  TB03. My supervisor does not attempt to deceive subordinates for personal gain.  TB04. I can rely on my supervisor when I need assistance. |  |
| Work Engagement | VIT01. I am able to work for long periods of time without feeling fatigued.  VIT02. I feel full of energy when I am working.  VIT03. I remain persistent even when things do not go well at work.  VIT04. When I wake up in the morning, I feel motivated to go to work. |  |
